# Supplementary material
Source: Springer Nature journal article supplement (https://www.springermedizin.de/resource/supplementary/12916_2012_607_MOESM2_ESM.pdf/9597910)
Supplement: MOESM2 [file 9597910]

Ethics, recruitment, consent, sample collection, sample review and selection

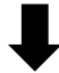

**PRIMARY ANALYSIS SET**  
100 frozen clear cell RCC tissue samples

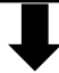

**FULL ANALYSIS**  
Whole genome sequencing, methylation, mRNA

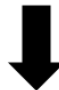

Selection of strong candidates

**TARGETED ANALYSIS – INITIAL VALIDATION**  
400 additional frozen clear cell RCC tissue samples

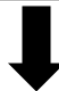

Refinement of selected candidates

**TARGETED ANALYSIS – FINAL VALIDATION**  
2300 additional samples

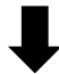

Tumour biology, clinical significance, exploitation in additional studies
